# Supplementary material
Source: HighWire-hosted journal article supplement (https://gut.bmj.com/content/71/8/1642)
Supplement: inline-supplementary-material-4 [file inline-supplementary-material-4.pdf]

## Supplemental Figure 3

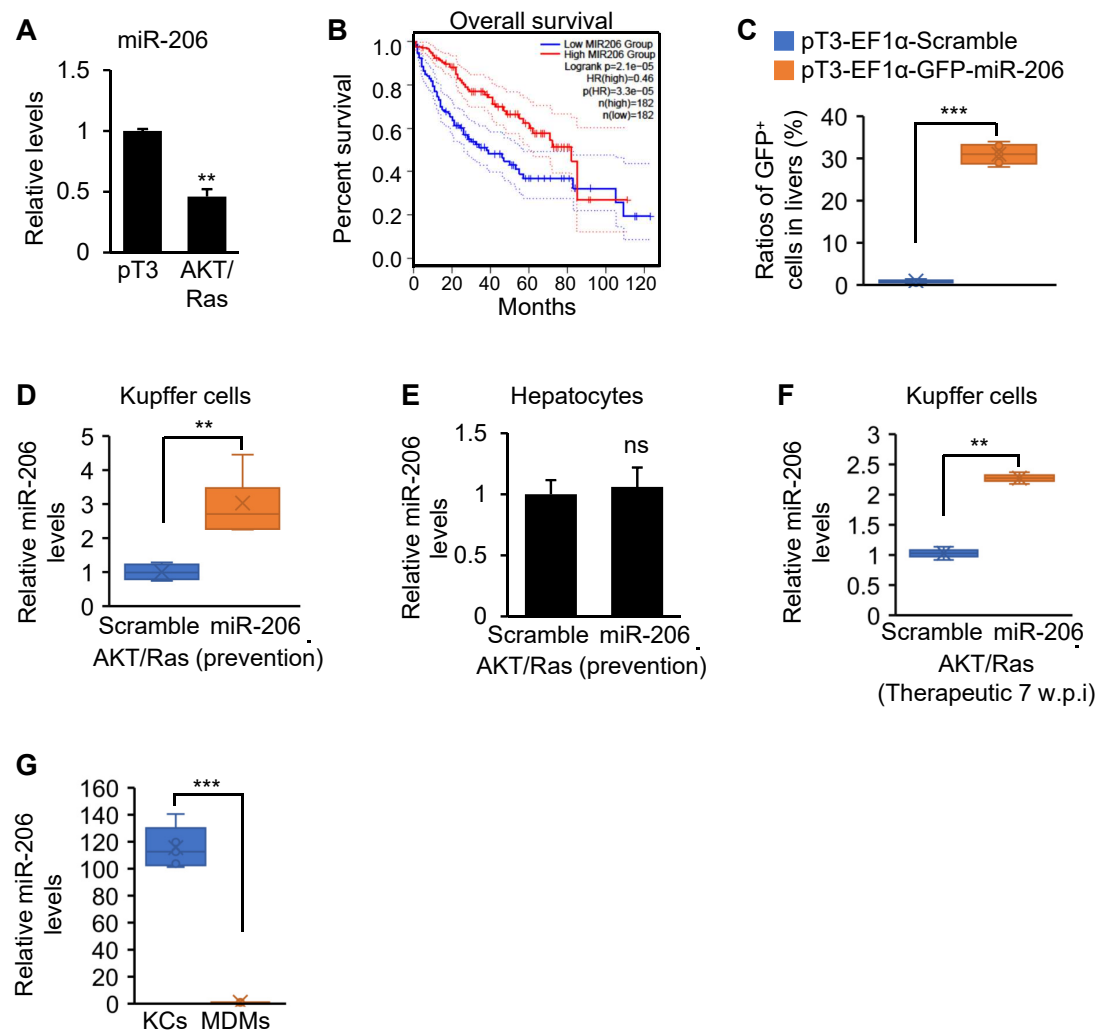

**Supplemental Figure 3 Hydrodynamic injection of miR-206 led to a repression of HCC in AKT/Ras mice.** (A) Levels of miR-206 in livers of mice injected with pT3-EF1 $\alpha$  (Control,  $n=6$ , 5 w.p.i) and AKT/Ras ( $n=6$ , 5 w.p.i) (Mann-Whitney test). (B) Low levels of miR-206 predicted a poor survival rate of HCC patients in the TCGA database (log-rank test). (C) GFP-positive liver cells in mice injected with pT3-EF1 $\alpha$ -scramble ( $n=6$ , 5 w.p.i) or pT3-EF1 $\alpha$ -GFP-miR-206 ( $n=6$ , 5 w.p.i) (Mann-Whitney test). (D) Increased levels of miR-206 in KCs of AKT/Ras mice injected with pT3-CD68p-miR-206 ( $n=6$ , 5 w.p.i) or pT3-CD68p-scramble ( $n=6$ , 5 w.p.i) (Mann-Whitney test). (E) Levels of miR-206 in hepatocytes of livers from two groups of mice (Mann-Whitney test). (F) Levels of miR-206 in KCs of AKT/Ras mice injected with MC-CD68p-scramble ( $n=6$ , 7 w.p.i) or MC-CD68p-miR-206 ( $n=6$ , 7 w.p.i) (Mann-Whitney test). (G) Levels of miR-206 in KCs and MDMs (monocyte-derived macrophages) of FVB/NJ mice injected with pT3-CD68p-miR-206 (Mann-Whitney test). Data represent mean  $\pm$  SEM. \*\* $p < 0.01$ , \*\*\* $p < 0.001$  and ns: no significance.
