# Supplementary material
Source: HighWire-hosted journal article supplement (https://gut.bmj.com/content/71/8/1642)
Supplement: inline-supplementary-material-5 [file inline-supplementary-material-5.pdf]

Supplemental Table 1 12 undetectable miRNAs in HCC tumors of AKT/Ras mice

| miRNA ID        | Normalized Signal |       |       |                            |   |   |
|-----------------|-------------------|-------|-------|----------------------------|---|---|
|                 | Normal mice       |       |       | HCC tumors of AKT/Ras mice |   |   |
| mmu-miR-137     | 39.28             | 32.83 | 32.17 | U                          | U | U |
| mmu-miR-1892    | 37.57             | 83.04 | 37.53 | U                          | U | U |
| mmu-miR-1901    | 37.57             | 28.97 | 29.49 | U                          | U | U |
| mmu-miR-669i    | 37.57             | 32.83 | 32.17 | U                          | U | U |
| mmu-miR-291a-3p | 35.86             | 48.28 | 32.17 | U                          | U | U |
| mmu-miR-207     | 34.15             | 40.55 | 34.85 | U                          | U | U |
| mmu-miR-346     | 32.44             | 32.83 | 29.49 | U                          | U | U |
| mmu-miR-206     | 29.03             | 28.97 | 29.49 | U                          | U | U |
| mmu-miR-186     | 23.91             | 46.35 | 29.49 | U                          | U | U |
| mmu-miR-466d-5p | 22.2              | 34.76 | 48.25 | U                          | U | U |
| mmu-miR-547     | 22.2              | 32.83 | 34.85 | U                          | U | U |
| mmu-miR-688     | 22.2              | 44.42 | 37.53 | U                          | U | U |

miRNA profiling of livers in normal mice (n=3) and HCC tumors of AKT/Ras mice (n=3) were performed using nCounter miRGE™ Assay (Nanostring Technologies, Seattle, WA) as described in Supplemental Methods. U represents undetectable.
