# Supplementary material
Source: HighWire-hosted journal article supplement (https://gut.bmj.com/content/71/8/1642)
Supplement: inline-supplementary-material-6 [file inline-supplementary-material-6.pdf]

Supplemental Table 2

| Sample ID | Gender | Age | AFP (ug/L) | Etiology | Tumor size (cm) | Cirrhosis | miR-206 Fold Change (HCC/NL) |
|-----------|--------|-----|------------|----------|-----------------|-----------|------------------------------|
| 1780990   | F      | 45  | 840.1      | HBV      | >5              | N         | 0.22*                        |
| 1800744   | M      | 43  | 4.3        | HBV      | >5              | Y         | 0.076831079**                |
| 1737195   | M      | 29  | 3          | HBV      | >5              | Y         | 5.54010783                   |
| 1804764   | M      | 56  | 54.3       | HBV      | >5              | Y         | 0.443472251*                 |
| 1788650   | F      | 63  | 115        | HCV      | >5              | Y         | 0.015425685**                |
| 1807021   | M      | 40  | 13.8       | HBV      | <5              | N         | 0.050560796**                |
| 1808394   | M      | 65  | 272.5      | Ethanol  | >5              | Y         | 0.05197743**                 |
| 1870401   | M      | 51  | 7.5        | HBV      | >5              | Y         | 0.117566468*                 |
| 1807184   | M      | 63  | 7.4        | HBV      | >5              | N         | 0.715375188                  |
| 1808993   | F      | 80  | 3          | Ethanol  | >5              | Y         | 0.44*                        |
| 1809098   | M      | 48  | 13821.9    | HBV      | <5              | Y         | 0.205056973*                 |
| 1810468   | M      | 58  | 235.4      | Ethanol  | >5              | Y         | 12.53778927                  |
| 1812069   | F      | 31  | N/A        | HBV      | >5              | N         | 1.278058857                  |
| 1817160   | M      | 68  | 2.3        | HBV      | >5              | Y         | 0.052951871**                |
| 1814239   | M      | 53  | 52374.1    | Ethanol  | >5              | Y         | 0.154562302*                 |
| 1820136   | M      | 62  | 4          | Ethanol  | >5              | Y         | 0.102179499*                 |
| 3360045   | M      | 47  | 5          | HBV      | >5              | Y         | 0.455692561*                 |
| 3715596   | F      | 49  | 25         | HBV      | >5              | Y         | 0.33*                        |
| 3450695   | M      | 54  | 1443       | HBV      | >5              | Y         | 0.664267327                  |
| 3795881   | M      | 43  | 33         | Ethanol  | >5              | Y         | 0.549453402*                 |
| 3341120   | M      | 43  | 324        | Ethanol  | >5              | N         | 0.590369757*                 |
| 3327592   | M      | 61  | 112        | HBV      | >5              | N         | 0.577092168*                 |
| 3684378   | M      | 44  | 2312       | HBV      | >5              | N         | 0.336259862*                 |
| 3711355   | M      | 52  | 2342       | HBV      | >5              | N         | 0.405231965*                 |
| 3640410   | M      | 62  | 33         | HCV      | <5              | Y         | 0.823502475                  |
| 3656135   | M      | 62  | 33         | HBV      | >5              | Y         | 0.212195036**                |
| 3630945   | M      | 37  | 232        | HBV      | >5              | Y         | 1.846301943                  |
| 3703656   | M      | 45  | 88         | Ethanol  | >5              | Y         | 0.342248316**                |
| 3679506   | F      | 64  | 343        | Ethanol  | <5              | N         | 0.563214937*                 |
| 3726722   | M      | 62  | 111        | HBV      | >5              | Y         | 0.621901094*                 |
| 3726523   | M      | 39  | 2324       | HBV      | >5              | Y         | 0.477367904*                 |
| 3726524   | M      | 44  | 1224       | HCV      | >5              | Y         | 0.282352387*                 |
| 3726525   | M      | 49  | 551        | HCV      | <5              | Y         | 0.395463476**                |
| 3726526   | M      | 54  | 351        | HCV      | <5              | N         | 0.523423252*                 |
| 3726527   | M      | 41  | 44         | HCV      | <5              | Y         | 0.489394723*                 |
| 3726528   | F      | 66  | 51         | HCV      | >5              | Y         | 0.324253466*                 |
| 3726529   | M      | 48  | 199        | HCV      | >5              | Y         | 0.829296152                  |
| 3726530   | M      | 46  | 1211       | HCV      | >5              | Y         | 0.029341232***               |
| 3726531   | M      | 48  | 199        | Ethanol  | >5              | N         | 0.032929615**                |
| 3726532   | M      | 66  | 878        | HCV      | >5              | Y         | 0.093561293**                |

MiR-206 expression was analyzed in 31 pairs of human HCC tumors and their adjacent normal tissues. HCC tumors with reduced miR-206 were highlighted in yellow. Data represent mean  $\pm$  SEM. \* $p < 0.05$  and \*\* $p < 0.01$ .
