# Supplementary material
Source: HighWire-hosted journal article supplement (https://gut.bmj.com/content/71/8/1642)
Supplement: inline-supplementary-material-9 [file inline-supplementary-material-9.pdf]

## Supplemental Figure 6

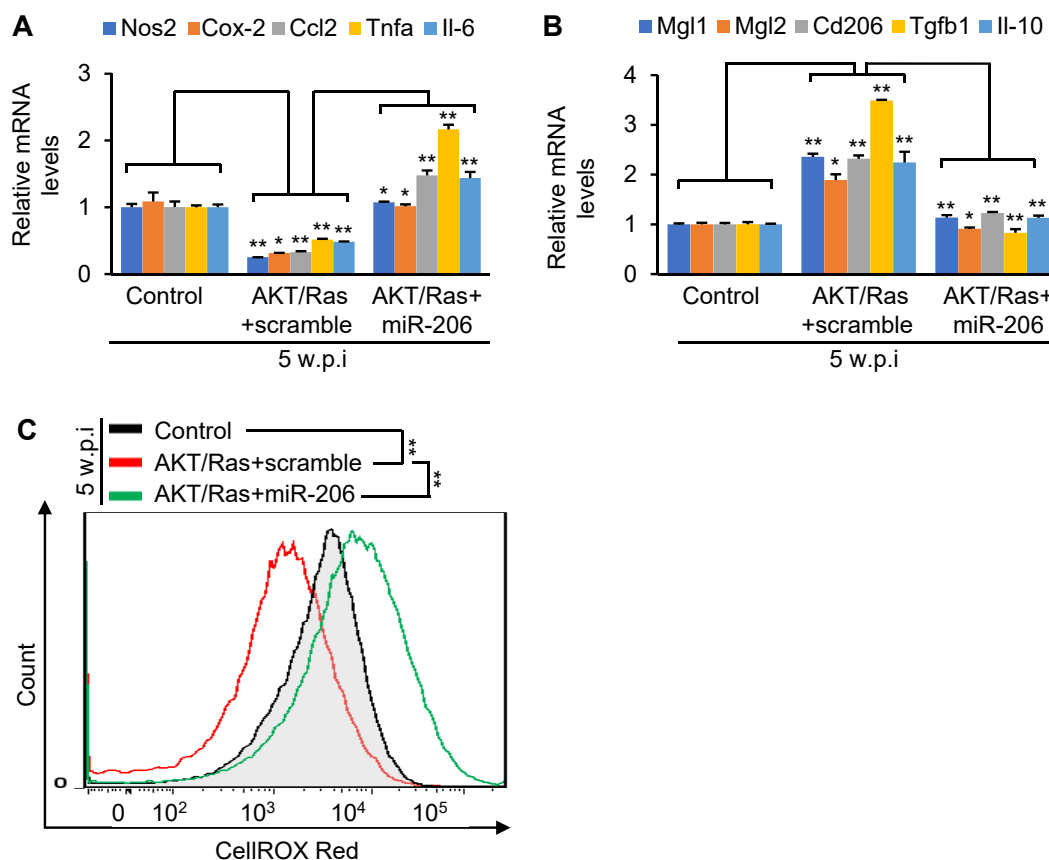

**Supplemental Figure 6 miR-206 offset the ability of AKT/Ras to drive M1 to M2 switch of KCs.** (A) mRNA levels of M1 marker genes in livers of FVB/NJ mice injected with pT3-EF1 $\alpha$  (control,  $n=6$ , 5 w.p.i), AKT/Ras/scramble ( $n=6$ , 5 w.p.i), or AKT/Ras/miR-206 ( $n=6$ , 5 w.p.i) (two-way ANOVA test). (B) mRNA levels of M2 marker genes in livers of three groups of mice (two-way ANOVA test). (C) Levels of oxidative stress in livers of three groups of mice, as revealed by CellRox Red staining (two-way ANOVA test). Data represent mean  $\pm$  SEM. \* $p < 0.05$ , \*\* $p < 0.01$ .
