# Supplementary material
Source: HighWire-hosted journal article supplement (https://gut.bmj.com/content/71/8/1642)
Supplement: inline-supplementary-material-10 [file inline-supplementary-material-10.pdf]

## Supplemental Figure 7

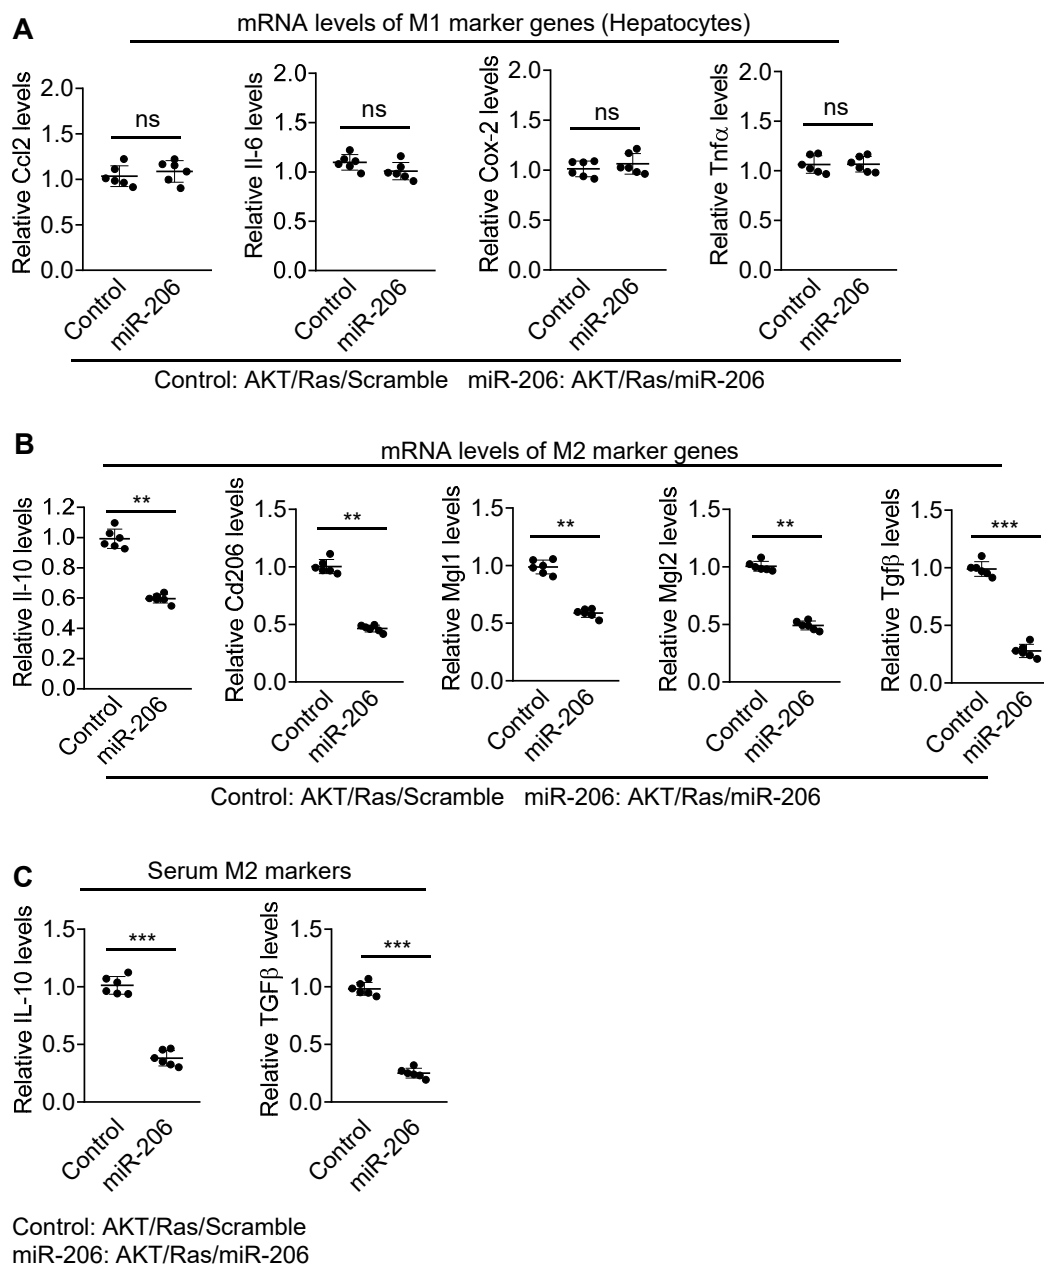

**Supplemental Figure 7 KC-specific expression of miR-206 drove M1 polarization of KCs.** (A) mRNA levels of M1 marker genes in hepatocytes of AKT/Ras mice injected with pT3-CD68p-scramble (control,  $n=6$ , 5 w.p.i) or pT3-CD68p-miR-206 ( $n=6$ , 5 w.p.i) (Mann-Whitney test). (B) mRNA levels of M2 marker genes in KCs of two groups of mice (Mann-Whitney test). (C) Serum levels of IL-10 and TGF $\beta$ 1 in two groups of mice (Mann-Whitney test). Data represent mean  $\pm$  SEM. \*\* $p < 0.01$ , \*\*\* $p < 0.001$  and ns: no significance.
