# Supplementary material
Source: HighWire-hosted journal article supplement (https://gut.bmj.com/content/71/8/1642)
Supplement: inline-supplementary-material-12 [file inline-supplementary-material-12.pdf]

## Supplemental Figure 9

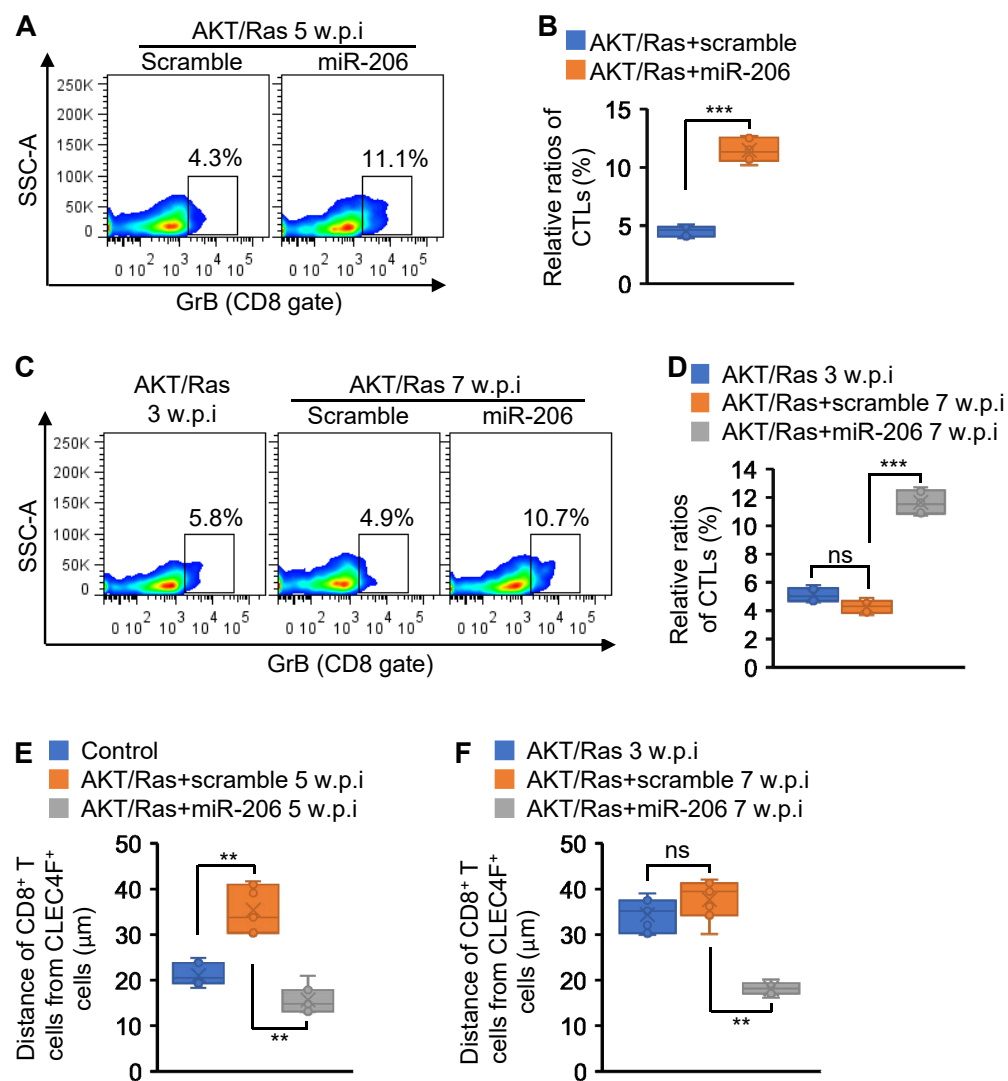

**Supplemental Figure 9 KC-specific expression of miR-206 increased hepatic CTLs in AKT/Ras mice. (A-B)** The ratios of CTLs in livers of AKT/Ras mice injected with pT3-CD68p-scramble ( $n=6$ , 5 w.p.i) or pT3-CD68p-miR-206 ( $n=6$ , 5 w.p.i) (Mann-Whitney test). **(C-D)** The ratios of CTLs in livers of AKT/Ras ( $n=6$ , 3 w.p.i), AKT/Ras/MC-CD68p-scramble ( $n=6$ , 7 w.p.i) and AKT/Ras/MC-CD68p-miR-206 ( $n=6$ , 7 w.p.i) mice (two-way ANOVA test). **(E)** Distance between CD8<sup>+</sup> T cells and KCs in livers of FVB/NJ mice injected with pT3-EF1 $\alpha$  ( $n=6$ , 5 w.p.i), AKT/Ras/pT3-CD68p-scramble ( $n=6$ , 5 w.p.i), or AKT/Ras/pT3-CD68p-miR-206 ( $n=6$ , 5 w.p.i) (two-way ANOVA test). **(F)** Distance between CD8<sup>+</sup> T cells and KCs in livers of AKT/Ras mice ( $n=6$ , 3 w.p.i), AKT/Ras/MC-CD68p-scramble ( $n=6$ , 7 w.p.i) and AKT/Ras/MC-CD68p-miR-206 ( $n=6$ , 7 w.p.i) mice (two-way ANOVA test). Data represent mean  $\pm$  SEM. \*\* $p < 0.01$ , \*\*\* $p < 0.001$  and ns: no significance.
