# Supplementary material
Source: HighWire-hosted journal article supplement (https://gut.bmj.com/content/71/8/1642)
Supplement: inline-supplementary-material-15 [file inline-supplementary-material-15.pdf]

Supplemental Table 4

| Gene Symbol | Macrophage | Hepatocyte | Fold Change (M/H) | ClipExp Num | RBP         | PITA | PicTar |
|-------------|------------|------------|-------------------|-------------|-------------|------|--------|
| Ptpn1       | 2.724946   | 0.31918277 | 8.537258941       | 1           | Ago2        | 1    | 1      |
| Klf4        | 1.451788   | 0.17372453 | 8.356839454       | 2           | Ago1-4,Ago2 | 1    | 1      |
| Sh3bgrl3    | 12.44184   | 0.60298732 | 20.63367099       | 3           | Ago1-4,Ago2 | 1    | 1      |
| Atp6v1b2    | 2.144636   | 0.24564223 | 8.730729168       | 6           | Ago2        | 1    | 1      |
| Cbl         | 1.306514   | 0.0903308  | 14.46366017       | 1           | Ago2        | 1    | 1      |
| Sat1        | 16.72816   | 1.96203903 | 8.525904968       | 1           | Ago2        | 1    | 1      |
| Tmsb4x      | 292.4607   | 9.41714571 | 31.05619355       | 6           | Ago1-4,Ago2 | 1    | 1      |
