# Supplementary material
Source: HighWire-hosted journal article supplement (https://gut.bmj.com/content/71/8/1642)
Supplement: inline-supplementary-material-16 [file inline-supplementary-material-16.pdf]

Supplemental Figure 11

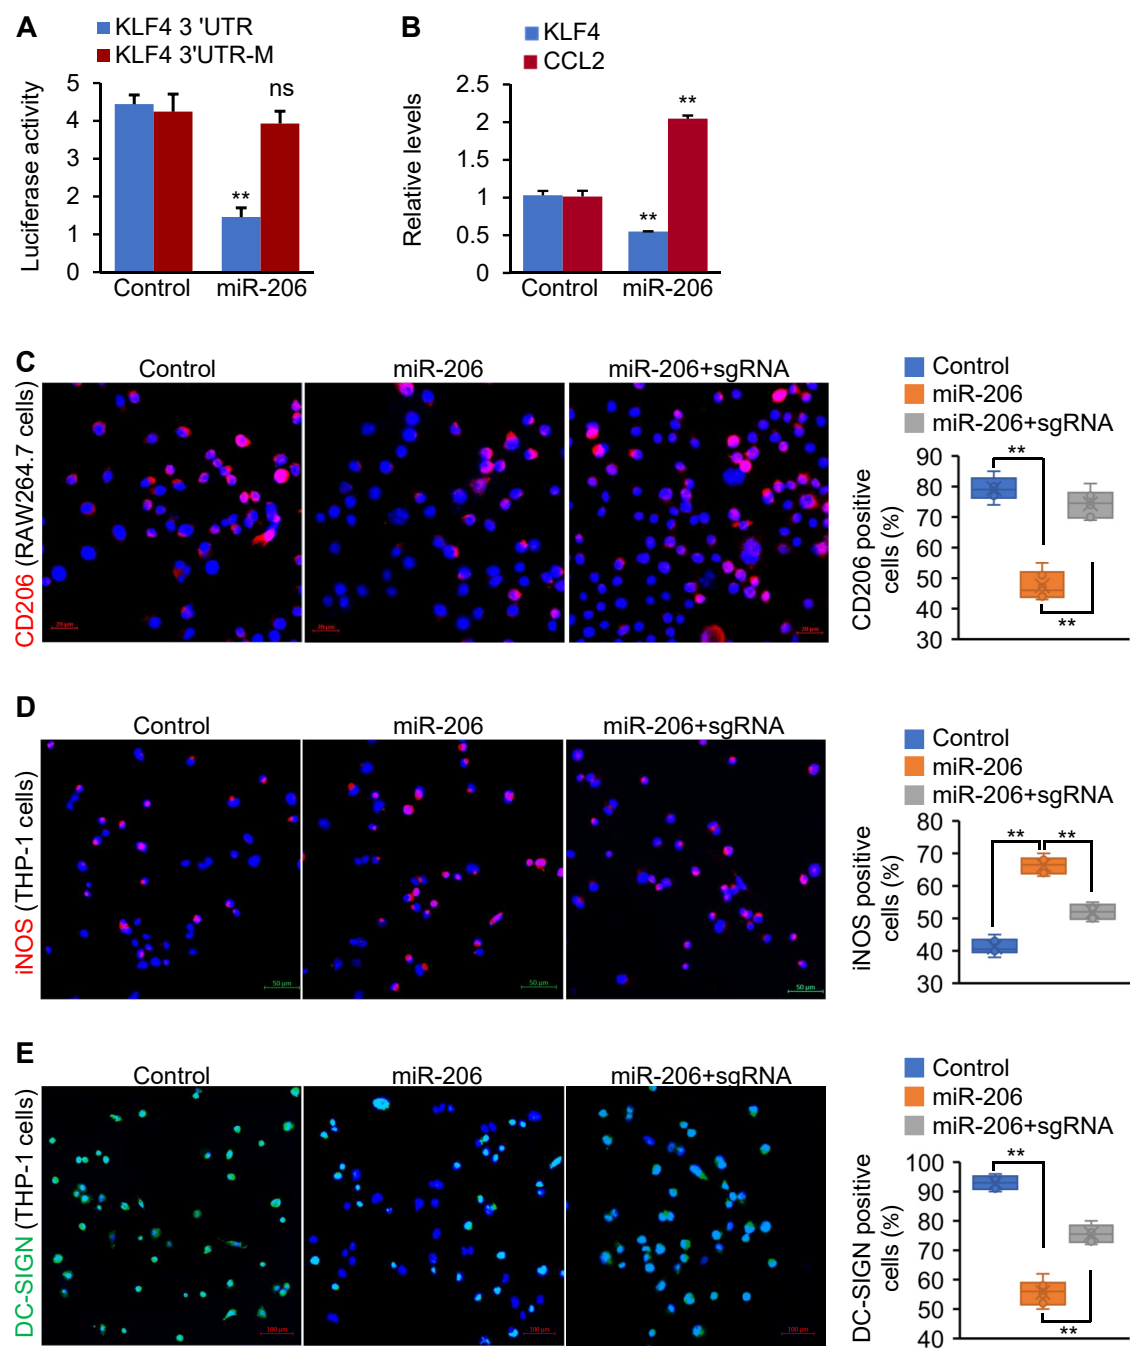

**Supplemental Figure 11 KLF4 was required for miR-206 to drive M1 polarization of RAW64.7 and THP-1 cells.** (A) Luciferase activities of the reporter constructs containing either the wild-type or mutated 3'UTRs of human *KLF4* after miR-206 overexpression (two-tailed student's *t* test). *KLF4* 3'UTR-M: miR-206 binding site was mutated within the 3'UTR of *KLF4*. (B) mRNA levels of *KLF4* and *CCL2* levels in THP-1 cells after miR-206 overexpression (two-tailed student's *t* test). (C) CD206 (M2 marker) staining and the ratios of CD206-positive cells in RAW264.7 cells transfected with pT3-CD68p-scramble (control), pT3-CD68p-miR-206, or a combination of pT3-CD68p-miR-206 and the sgRNA (two-way ANOVA test). (D) iNOS (M1 marker) staining and iNOS-positive cells in THP-1 cells transfected with pT3-CD68p-scramble (control), pT3-CD68p-miR-206, or a combination of pT3-CD68p-miR-206 and the sgRNA (two-way ANOVA test). THP-1 cells were treated with PMA, IFN- $\gamma$  and LPS. (E) DC-SIGN (M2 marker) staining and the ratios of DC-SIGN-positive cells in THP-1 cells transfected with pT3-CD68p-scramble (control), pT3-CD68p-miR-206, or a combination of pT3-CD68p-miR-206 and sgRNA (two-way ANOVA test). THP-1 cells were treated with PMA, IL-4 and IL-13. Data represent mean  $\pm$  SEM. \*\**p* < 0.01 and ns: no significance.
