# Supplementary material
Source: HighWire-hosted journal article supplement (https://gut.bmj.com/content/71/8/1642)
Supplement: inline-supplementary-material-18 [file inline-supplementary-material-18.pdf]

## Supplemental Figure 13

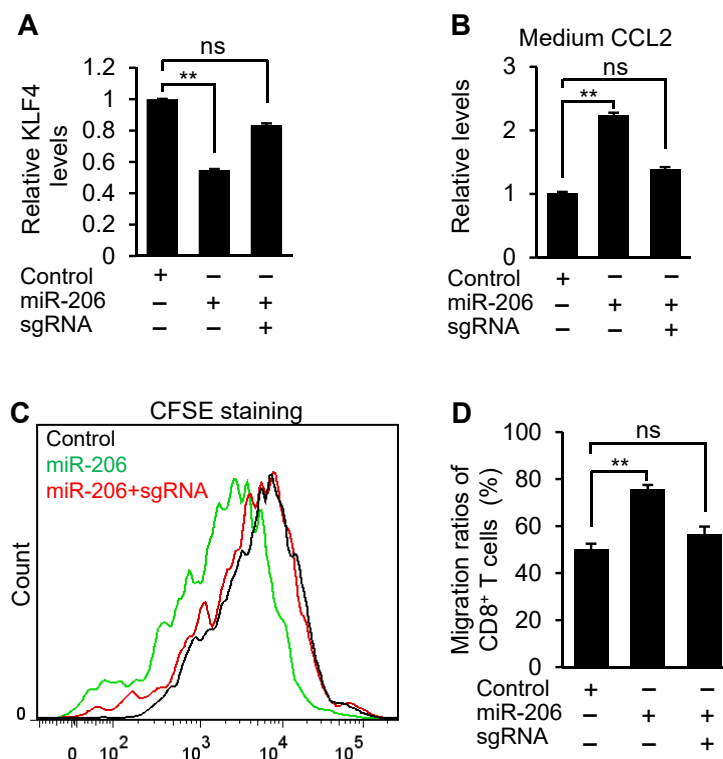

**Supplemental Figure 13 Ablation of the miR-206 binding site within the 3'UTR of *KLF4* impaired the ability of miR-206 to drive M1 polarization of THP-1 cells.** (A) mRNA levels of *KLF4* in THP-1 cells transfected with pT3-CD68p-scramble (control), pT3-CD68p-miR-206 (miR-206), or a combination of pT3-CD68p-miR-206 and the sgRNA (two-way ANOVA test). (B) Levels of CCL2 in the medium used for culturing three groups of THP-1 cells (two-way ANOVA test). (C) Proliferation of CD8<sup>+</sup> T cells co-cultured with three groups of THP-1 cells (two-way ANOVA test). (D) The migration ratios of CD8<sup>+</sup> T cells co-cultured with three groups of THP-1 cells (two-way ANOVA test). Data represent mean  $\pm$  SEM. \*\* $p < 0.01$  and ns: no significance.
