# Supplementary material
Source: HighWire-hosted journal article supplement (https://gut.bmj.com/content/71/8/1642)
Supplement: inline-supplementary-material-19 [file inline-supplementary-material-19.pdf]

Supplemental Figure 14

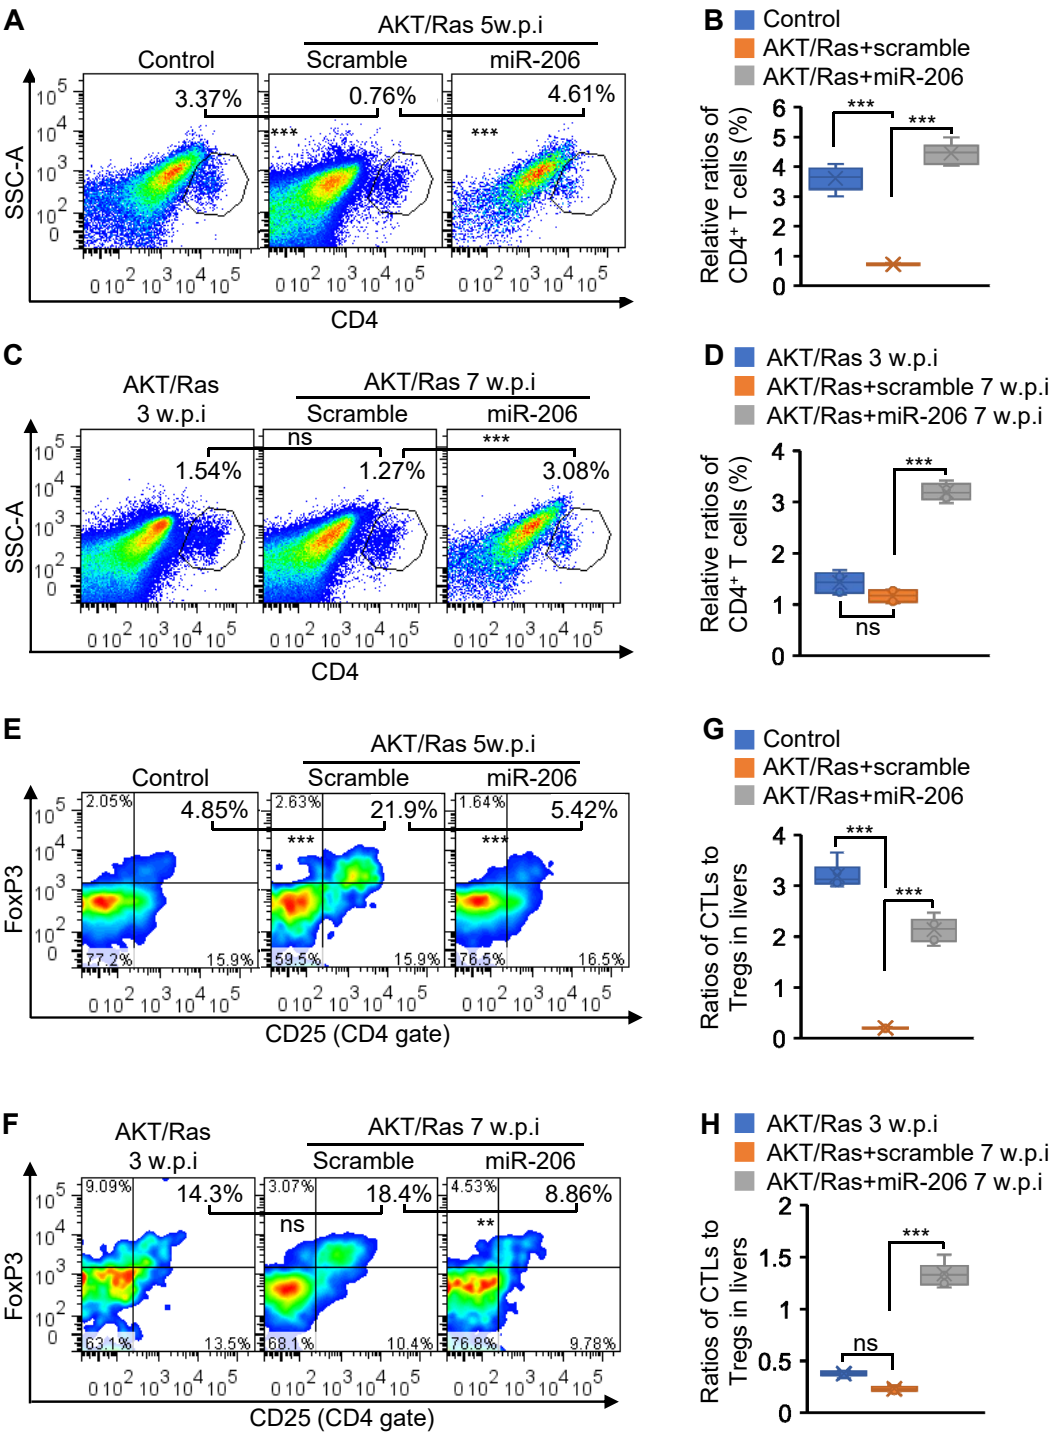

**Supplemental Figure 14 miR-206 increased hepatic CD4<sup>+</sup> T cells and reduced Tregs in AKT/Ras mice. (A-B)** Levels of hepatic CD4<sup>+</sup> T cells in FVB/NJ mice injected with pT3-EF1 $\alpha$  (control,  $n=6$ , 5 w.p.i), AKT/Ras/pT3-CD68p-scramble ( $n=6$ , 5 w.p.i), or AKT/Ras/pT3-CD68p-miR-206 ( $n=6$ , 5 w.p.i) (two-way ANOVA test). **(C-D)** Levels of hepatic CD4<sup>+</sup> T cells in AKT/Ras ( $n=6$ , 3 w.p.i), AKT/Ras/MC-CD68p-scramble ( $n=6$ , 7 w.p.i), and AKT/Ras/MC-CD68p-miR-206 ( $n=6$ , 7 w.p.i) mice (two-way ANOVA test). **(E)** Flow cytometry analysis of Tregs (CD4<sup>+</sup>CD25<sup>+</sup>FoxP3<sup>+</sup>) in livers of FVB/NJ mice injected with pT3-EF1 $\alpha$  (control,  $n=6$ , 5 w.p.i), AKT/Ras/pT3-CD68p-scramble ( $n=6$ , 5 w.p.i), or AKT/Ras/pT3-CD68p-miR-206 ( $n=6$ , 5 w.p.i) (two-way ANOVA test). **(F)** Flow cytometry analysis of hepatic Tregs in AKT/Ras ( $n=6$ , 3 w.p.i), AKT/Ras/MC-CD68p-scramble ( $n=6$ , 7 w.p.i), and AKT/Ras/MC-CD68p-miR-206 ( $n=6$ , 7 w.p.i) mice (two-way ANOVA test). **(G)** The ratios of CTLs to Tregs in livers of FVB/NJ mice injected with pT3-EF1 $\alpha$  (control,  $n=6$ , 5 w.p.i), AKT/Ras/pT3-CD68p-scramble ( $n=6$ , 5 w.p.i), or AKT/Ras/pT3-CD68p-miR-206 ( $n=6$ , 5 w.p.i) (two-way ANOVA test). **(H)** The ratios of CTLs to Tregs in livers of AKT/Ras ( $n=6$ , 3 w.p.i), AKT/Ras/MC-CD68p-scramble ( $n=6$ , 7 w.p.i), and AKT/Ras/MC-CD68p-miR-206 ( $n=6$ , 7 w.p.i) mice (two-way ANOVA test). Data represent mean  $\pm$  SEM. \*\* $p < 0.01$ , \*\*\* $p < 0.001$  and ns: no significance.
