# Supplementary material
Source: HighWire-hosted journal article supplement (https://gut.bmj.com/content/71/8/1642)
Supplement: inline-supplementary-material-20 [file inline-supplementary-material-20.pdf]

## Supplemental Figure 15

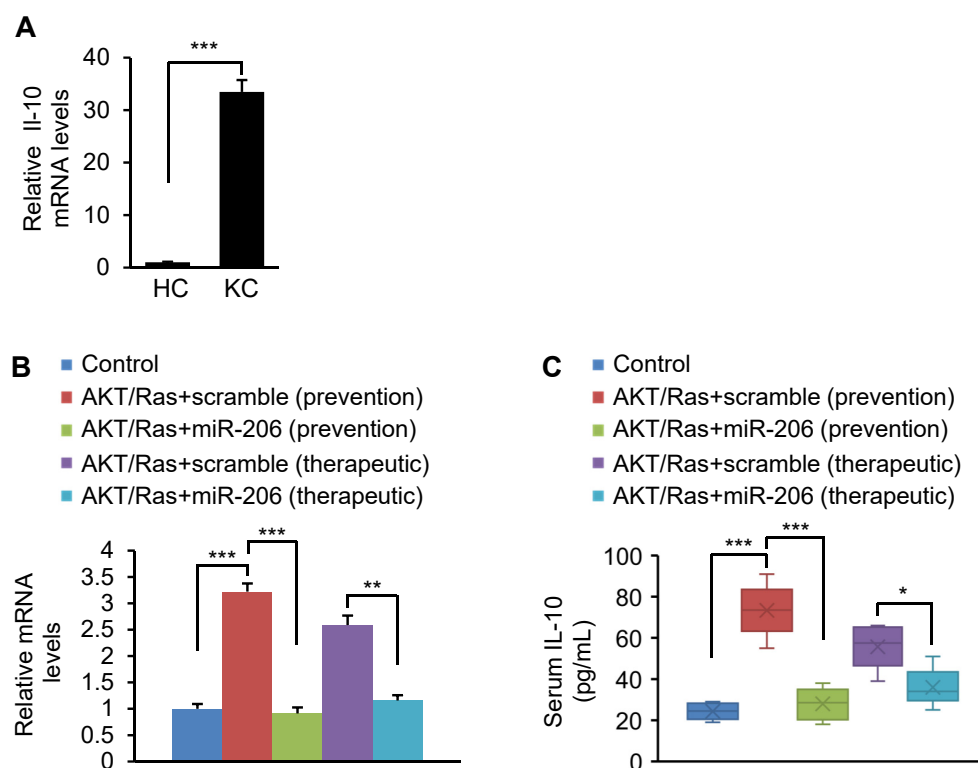

**Supplemental Figure 15 KC-specific expression of miR-206 inhibited expression of IL-10.** (A) mRNA levels of *Il-10* in KCs and hepatocytes isolated from healthy livers of FVB/NJ mice (two-tailed student's *t* test). (B) mRNA levels of *Il-10* in KCs of five groups of AKT/Ras mice injected with pT3-EF1 $\alpha$  (control, *n*=6, 5 w.p.i), pT3-CD68p-scramble (*n*=6, 5 w.p.i, prevention model), pT3-CD68p-miR-206 (*n*=6, 5 w.p.i, prevention model), MC-CD68p-scramble (*n*=6, 7 w.p.i, therapeutic model), or MC-CD68p-miR-206 (*n*=6, 7 w.p.i, therapeutic model) (two-way ANOVA test). (C) ELISA detection of serum IL-10 levels in five groups of mice (two-way ANOVA test). Data represent mean  $\pm$  SEM. \**p* < 0.05, \*\**p* < 0.01 and \*\*\**p* < 0.001.
